# Supplementary material for: Biogenesis and functions of aminocarboxypropyluridine in tRNA
Source: PubMed Central journal article supplement (PMC6895100; doi:10.1038/s41467-019-13525-3), 2019-12-05
Supplement: 41467_2019_13525_MOESM1_ESM.pdf [file 41467_2019_13525_MOESM1_ESM.pdf]

## **Supplementary information**

### **Biogenesis and functions of aminocarboxypropyluridine in tRNA**

Takakura et al.

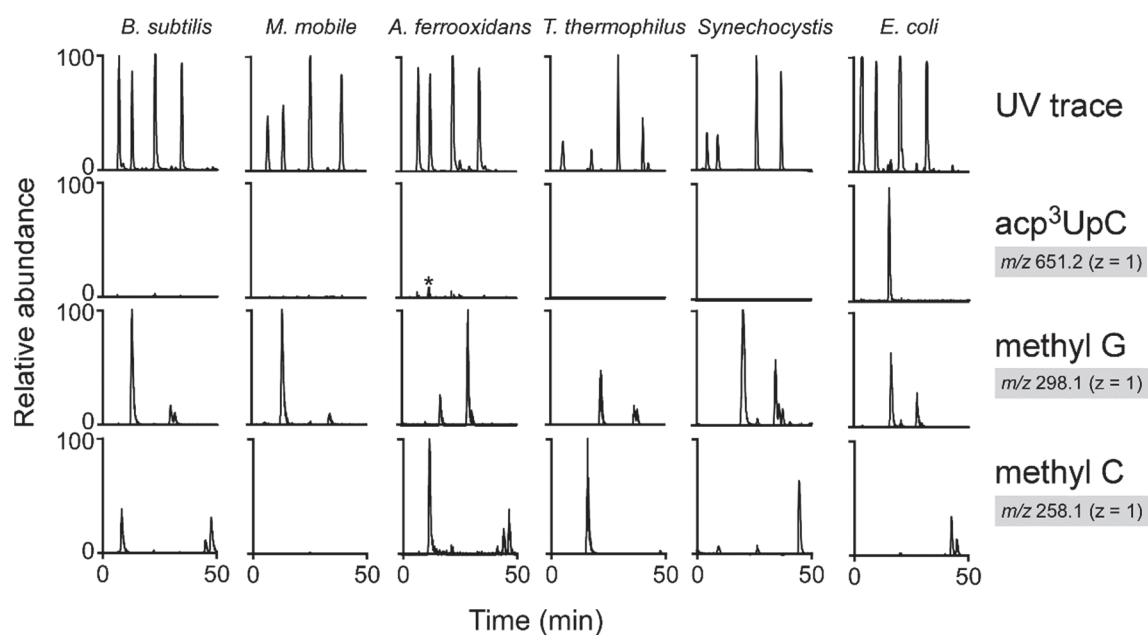

**Supplementary Figure 1. Mass spectrometric nucleoside analyses of tRNA modifications in various bacteria.**

Top panels represent UV trace. Second, third and fourth panels show XICs of the proton adducts of acp<sup>3</sup>UpC, methylguanosines and methylcytidines, respectively. Asterisk indicates nonspecific peak with the same *m/z* value.

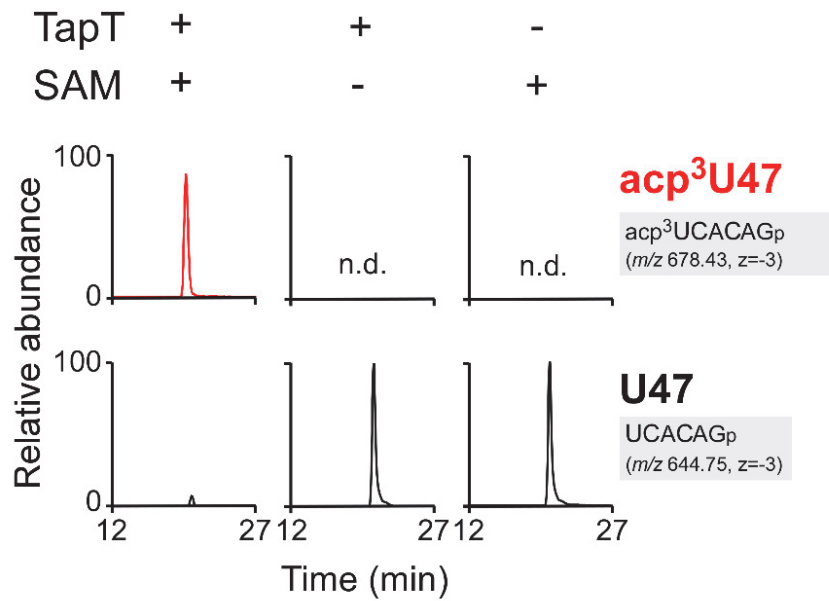

**Supplementary Figure 2. *In vitro* reconstitution of acp<sup>3</sup>U47 in tRNA<sup>Met</sup> transcript by TapT.**

*In vitro* acp<sup>3</sup>U formation was performed in the presence or absence of TapT and SAM. XICs show negative ions of the RNase T<sub>1</sub>-digested fragments with (upper panels) or without (lower panels) acp<sup>3</sup>U47.

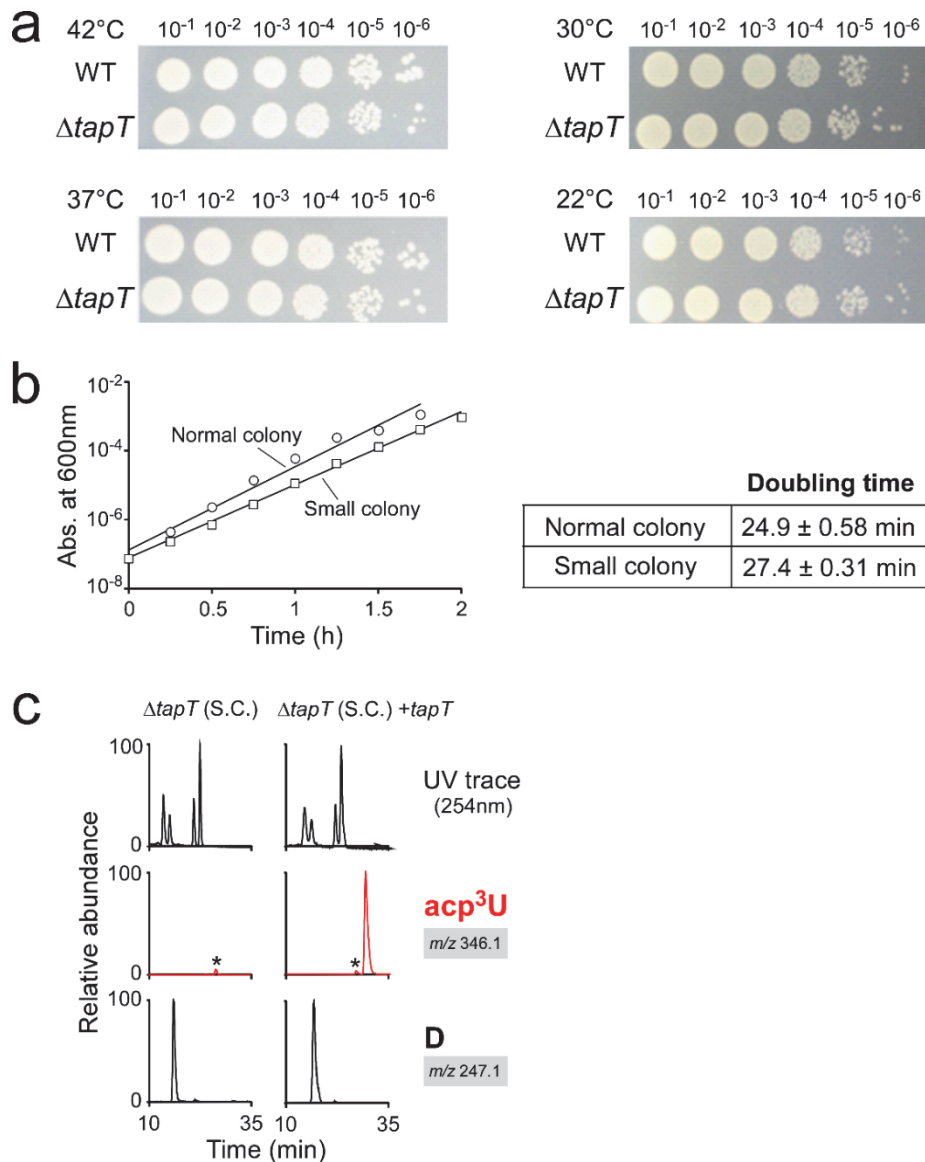

**Supplementary Figure 3. Growth and morphological properties of  $\Delta tapT$  strain.**

(a) Overnight full-growth cultures were serially diluted ( $A_{600}$ ,  $10^{-1}$  to  $10^{-6}$ ), spotted onto LB plates, and cultivated at 42°C, 37°C, 30°C, or 22°C.

(b) Growth curves of small colony-derived cells (square) and the normal colony-derived cells (circle) cultured at 37°C in LB medium. The doubling time of each strain represents average value of biological triplicates, with s.d. Source data are provided as a Source Data file.

(c) Mass spectrometric nucleoside analyses of tRNA modifications from  $\Delta tapT$  (left panels), and  $\Delta tapT$  rescued by plasmid-encoded  $tapT$  (right panels). Top panels are UV trace at 254 nm. XICs show the proton adducts of nucleosides for  $acp^3U$  (middle) and D (bottom). S.C. stands for small colony. Asterisks indicate nonspecific peaks with the same  $m/z$  value.

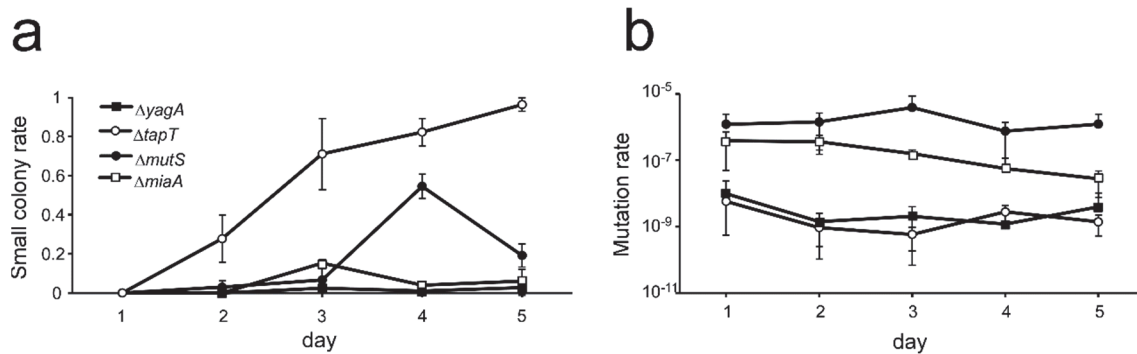

**Supplementary Figure 4. Mutation rate does not increase in  $\Delta tapT$  strain.**

Frequencies of small colony appearance (a) and mutation ratio (b) in  $\Delta yagA$  (closed square),  $\Delta tapT$  (open circle),  $\Delta mutS$  (closed circle), and  $\Delta miaA$  (open square) cultivated continuously at 42°C. Data represent average values of biological triplicates, with s.d. Source data are provided as a Source Data file.

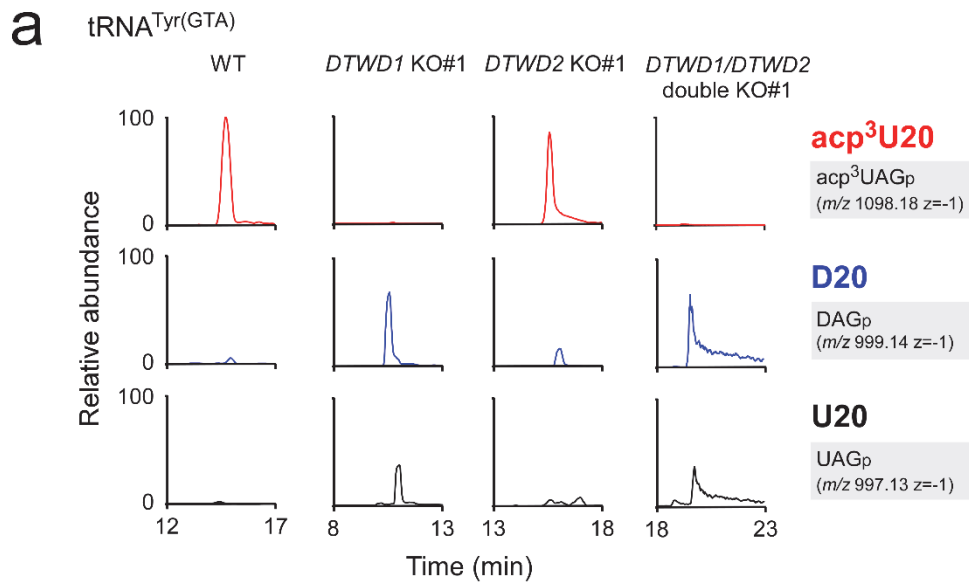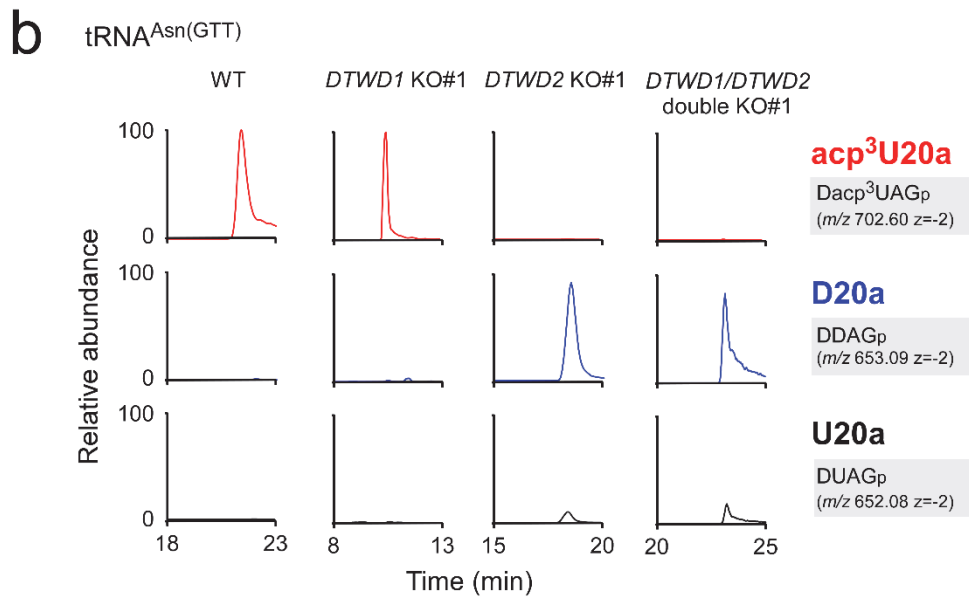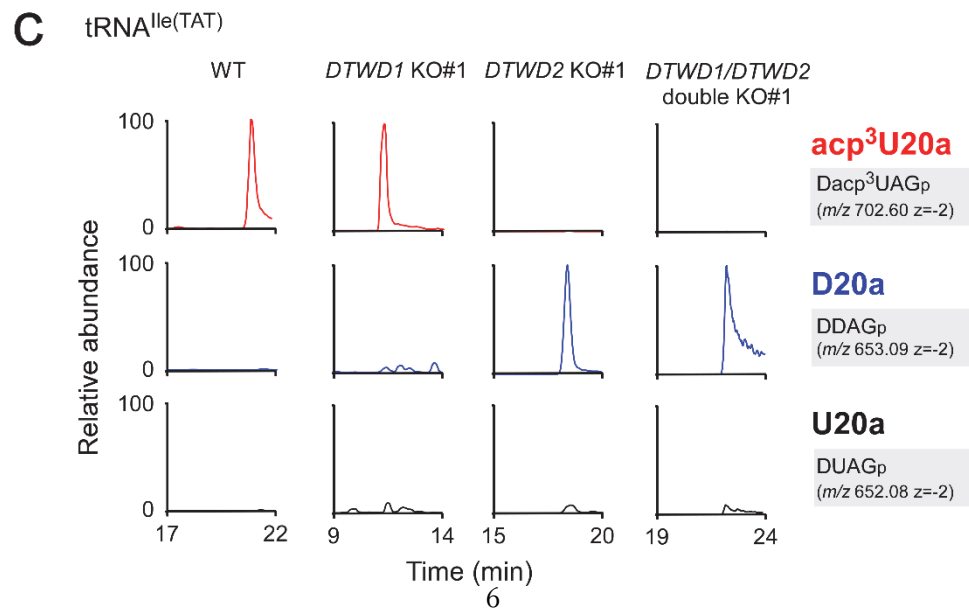

**Supplementary Figure 5. Human *DTWD1* and *DTWD2* are responsible for acp<sup>3</sup>U formation.**

Mass spectrometric analyses of acp<sup>3</sup>U20 in tRNA<sup>Tyr(GTA)</sup> (a), and acp<sup>3</sup>U20a in tRNA<sup>Asn(GTT)</sup> (b) and tRNA<sup>Ile(TAT)</sup> (c) isolated from WT (left), *DTWD1* KO (left middle), *DTWD2* KO (right middle), *DTWD1/DTWD2* double-KO (right) strains. XICs show corresponding negative ions of the RNase T<sub>1</sub>-digested fragments, as indicated on the right-hand side in each chromatogram. Mass spectra of D-containing fragments overlap with the isotopic peaks of U-containing fragments. The peak intensities of these fragments are normalized in consideration of those isotopes.

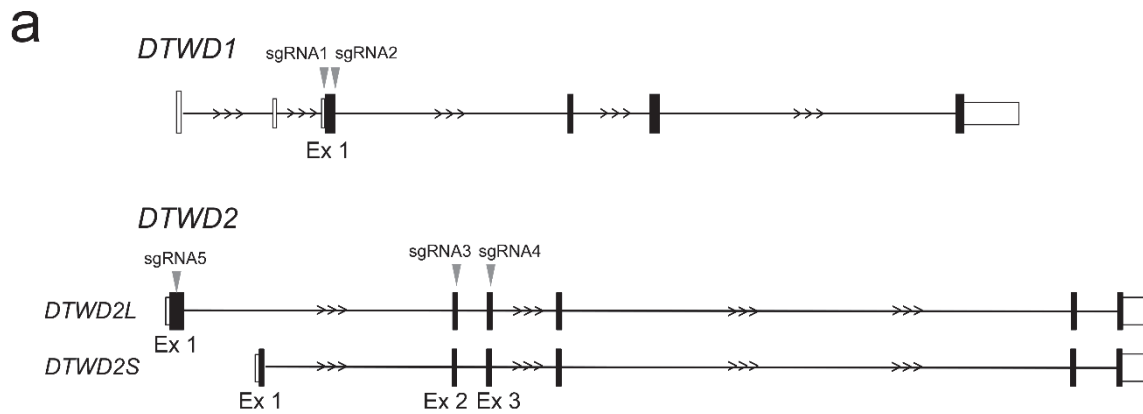

**b**

|        | sgRNA               | Genotype                                                                                                                                                                                                  |
|--------|---------------------|-----------------------------------------------------------------------------------------------------------------------------------------------------------------------------------------------------------|
| sgRNA1 | CCTATATTTCTCAACGAAG | <i>DTWD1</i> KO#1 sgRNA1 AAT <b>CCA</b> CCT A TA TTT CTC AAA CGAAGT (-5bp)<br>AAT CCA CCT A--( <b>194 bp</b> )--TA TTT CTC AAA CGAAGT                                                                     |
| sgRNA2 | GAATGTTCACTGCTATACA | <i>DTWD1</i> KO#2 sgRNA2 TCC <b>AGA</b> AT <b>G</b> TTC TAC TGC TAT ACA TGT (-10bp)<br>TCC AGAATT <b>G</b> TTC TAC TGC TAT ACA TGT (+1bp)                                                                 |
| sgRNA3 | GATGCTGAATTATGTACAG | <i>DTWD2</i> KO#1 sgRNA3 CAT <b>ATG</b> T <b>CT</b> <b>AGC</b> <b>GAC</b> <b>TTG</b> TAC ATA ATT CAG CAT CCA (-16bp)                                                                                      |
| sgRNA4 | GGGAGGCATGGCTAGTAG  | <i>DTWD1DTWD2</i> double KO#1 sgRNA1 CAT ATC TCT ACC CAC <b>TFG</b> T <b>AC</b> ATA ATT CAG CAT CCA (-5bp)<br>sgRNA3 CAT ATC TCT ACC CAC <b>TFG</b> TAC ATA ATT CAG CAT CCA (-1bp)                        |
| sgRNA5 | GCCCCAGAAGGCGCCAAC  | <i>DTWD1DTWD2</i> double KO#2 sgRNA2 GTT CCT CTA <b>CTA</b> GCA GCA TGC CTC CCC CAG (-1bp)<br>sgRNA4 GTT CCT CTA <b>CTA</b> <b>G</b> CA GCA TGC CTC CCC CAG (-4bp)                                        |
|        |                     | <i>DTWD2L</i> KO#1 sgRNA5 TGA GGC <b>CCC</b> <b>AGA</b> <b>AAG</b> <b>CCG</b> <b>CGC</b> <b>AAC</b> <b>GGG</b> CTC (-22bp)<br>TGA GGC CCC AGA <b>AGG</b> <b>CCG</b> <b>CGC</b> <b>AAC</b> GGG CTC (-11bp) |

**Supplementary Figure 6. Construction of human *DTWD1* and *DTWD2* knockout strains.**

(a) Diagram of the human *DTWD1* and *DTWD2* genes, with the sites targeted by sgRNAs.

(b) Sequences of sgRNAs that target human *DTWD1* and *DTWD2* genes (left panel). Genotypes of human *DTWD1* and *DTWD2* KO strains (right panel). The indels (insertions and deletions) in each strain are shown in red letters.



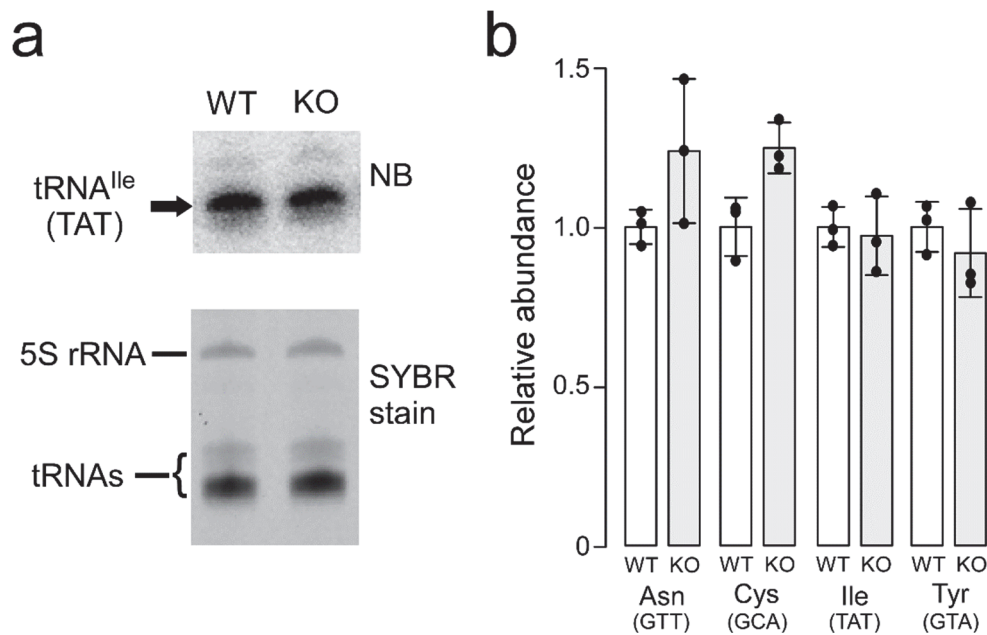

**Supplementary Figure 7. Steady-state levels of cytoplasmic tRNAs in the *DTWD1/DTWD2* double-KO strain.**

(a) Northern blotting (upper panel) of cytoplasmic tRNA<sup>Ile(TAT)</sup> in total RNAs of WT HEK293T and the double-KO strain. The lower panel shows the gel stained by SYBR Gold. Source data are provided as a Source Data file.

(b) Relative abundance of steady-state levels of tRNAs bearing acp<sup>3</sup>U modification. The band intensity of the respective tRNA in the Northern blotting was normalized against the intensity of 5S rRNA stained in the gel. Data represent average values of biological triplicates, with s.d. Source data are provided as a Source Data file.

a

Archaea

Bacteria

Eukaryote

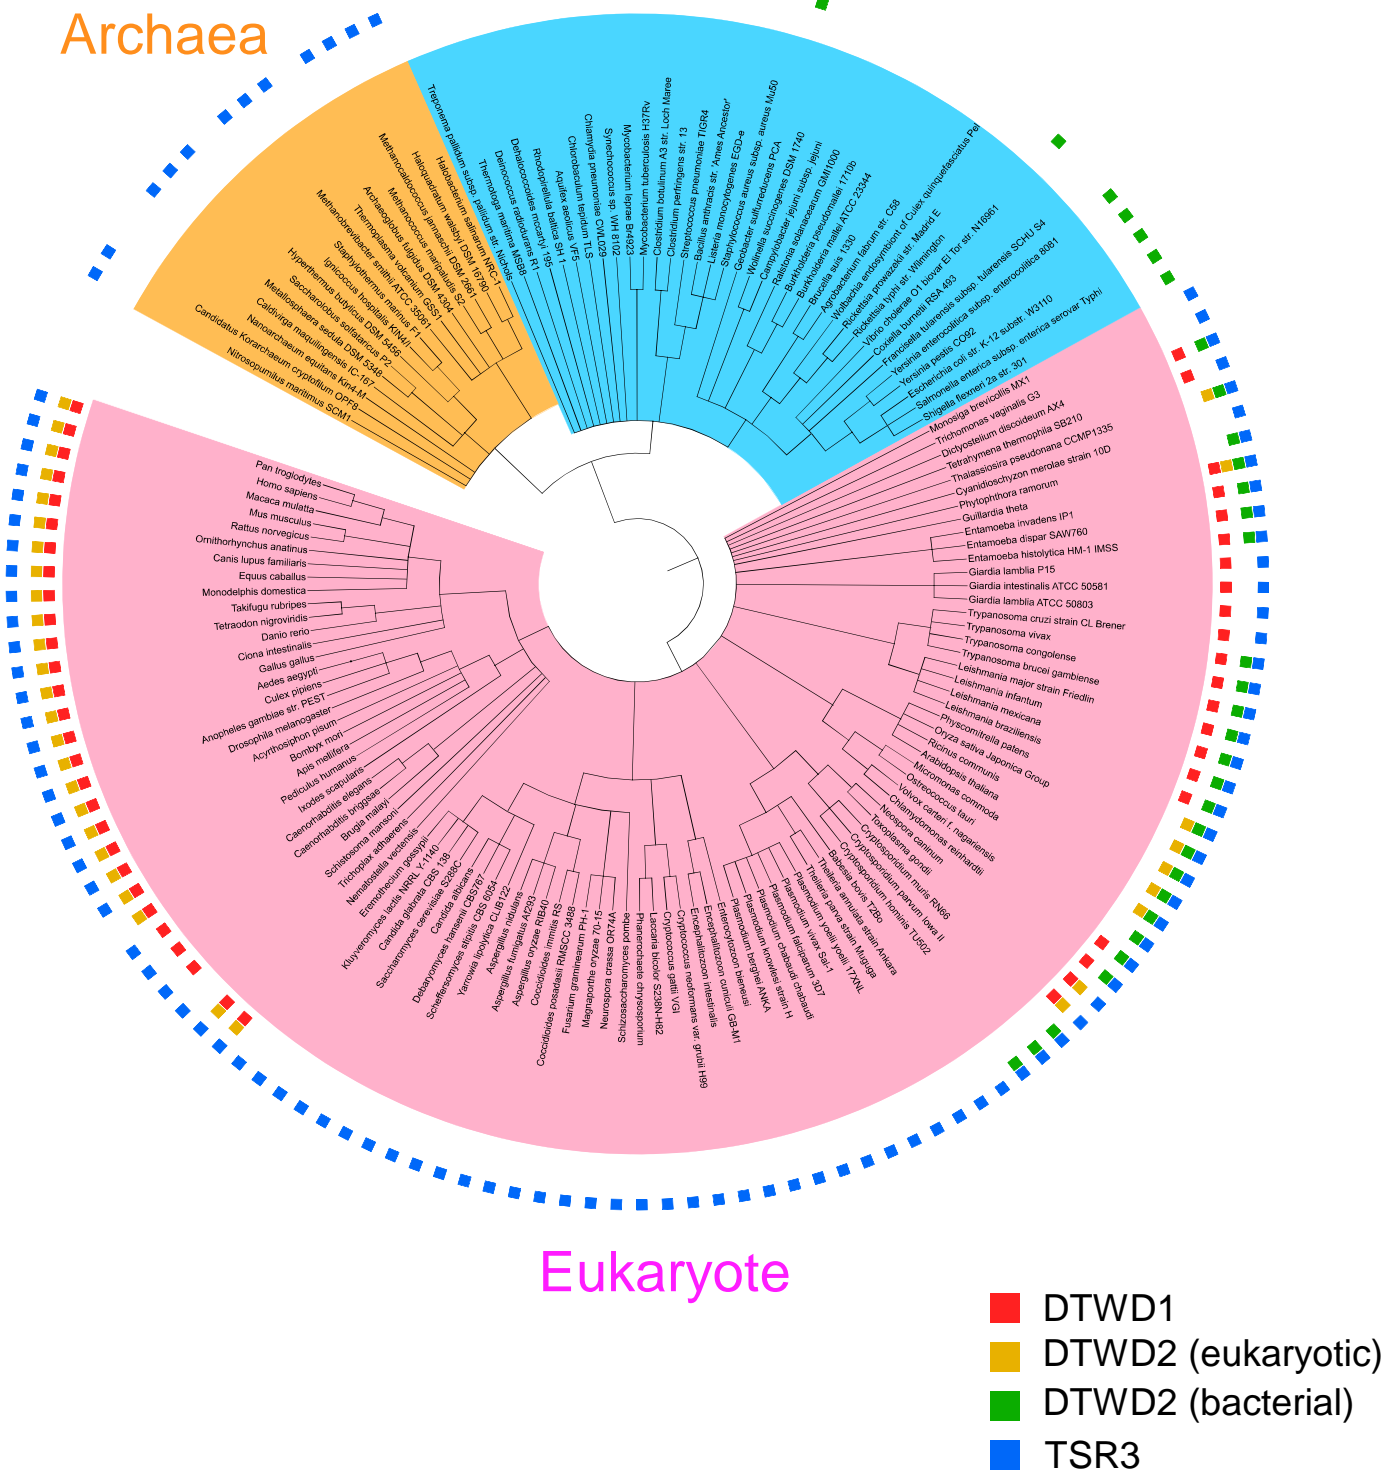

**b**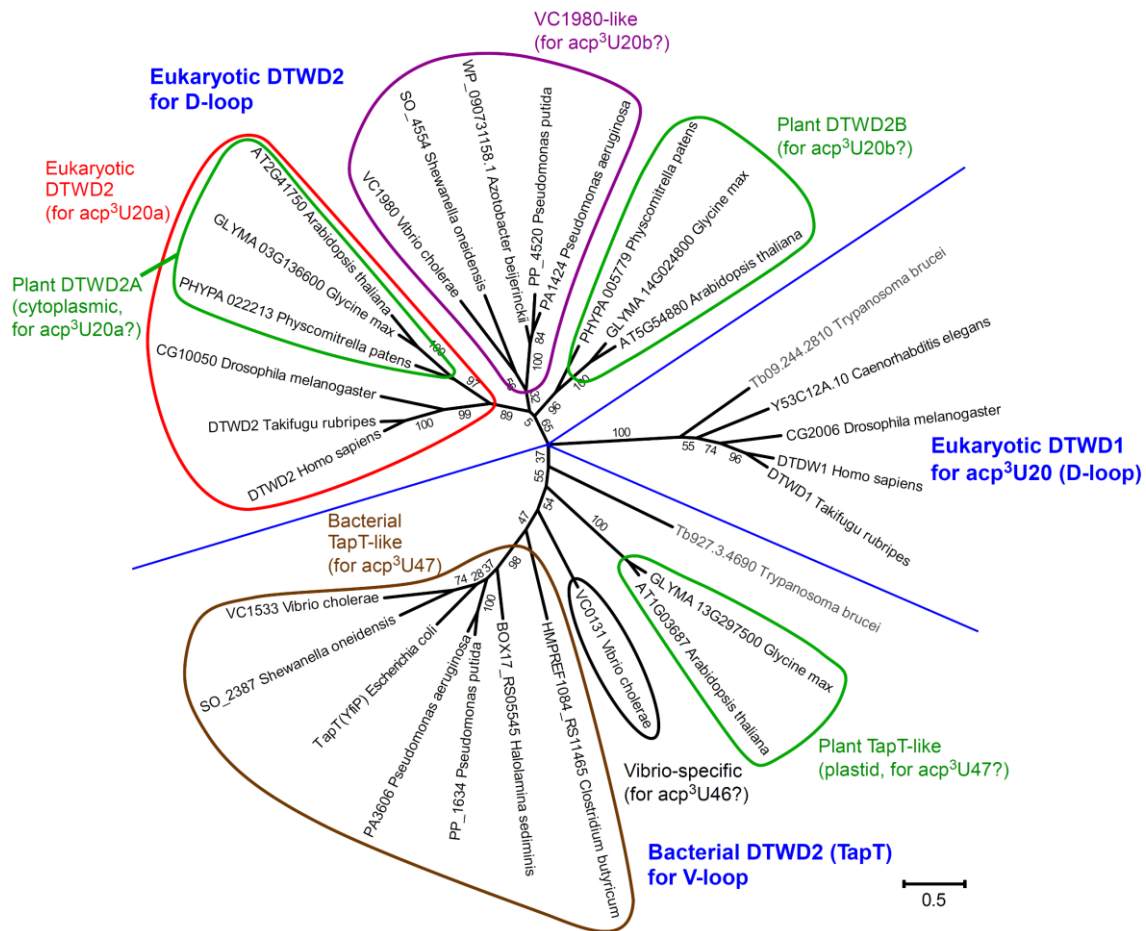

### Supplementary Figure 8. Phylogenetic analyses of DTW-containing proteins.

(a) Phylogenetic distribution of TDD superfamily proteins. Organisms and TDD superfamily protein sequences were obtained from OrthoMCL database<sup>1</sup>. A phylogenetic tree of the organisms was built using the common tree tool in NCBI taxonomy database and drawn by the iTOL v4 server<sup>2</sup>. DTWD2 proteins are classified into two subfamilies, eukaryotic and bacterial (TapT), based on the phylogenetic tree of DTWD2 family proteins. The presence of TDD superfamily proteins in each organism was manually checked by NCBI BLAST.

(b) Phylogenetic tree of DTW domain-containing proteins. Multiple alignment of DTW superfamily proteins was constructed using MAFFT. The maximum likelihood tree was constructed using MEGA software<sup>3</sup> with a bootstrap test.

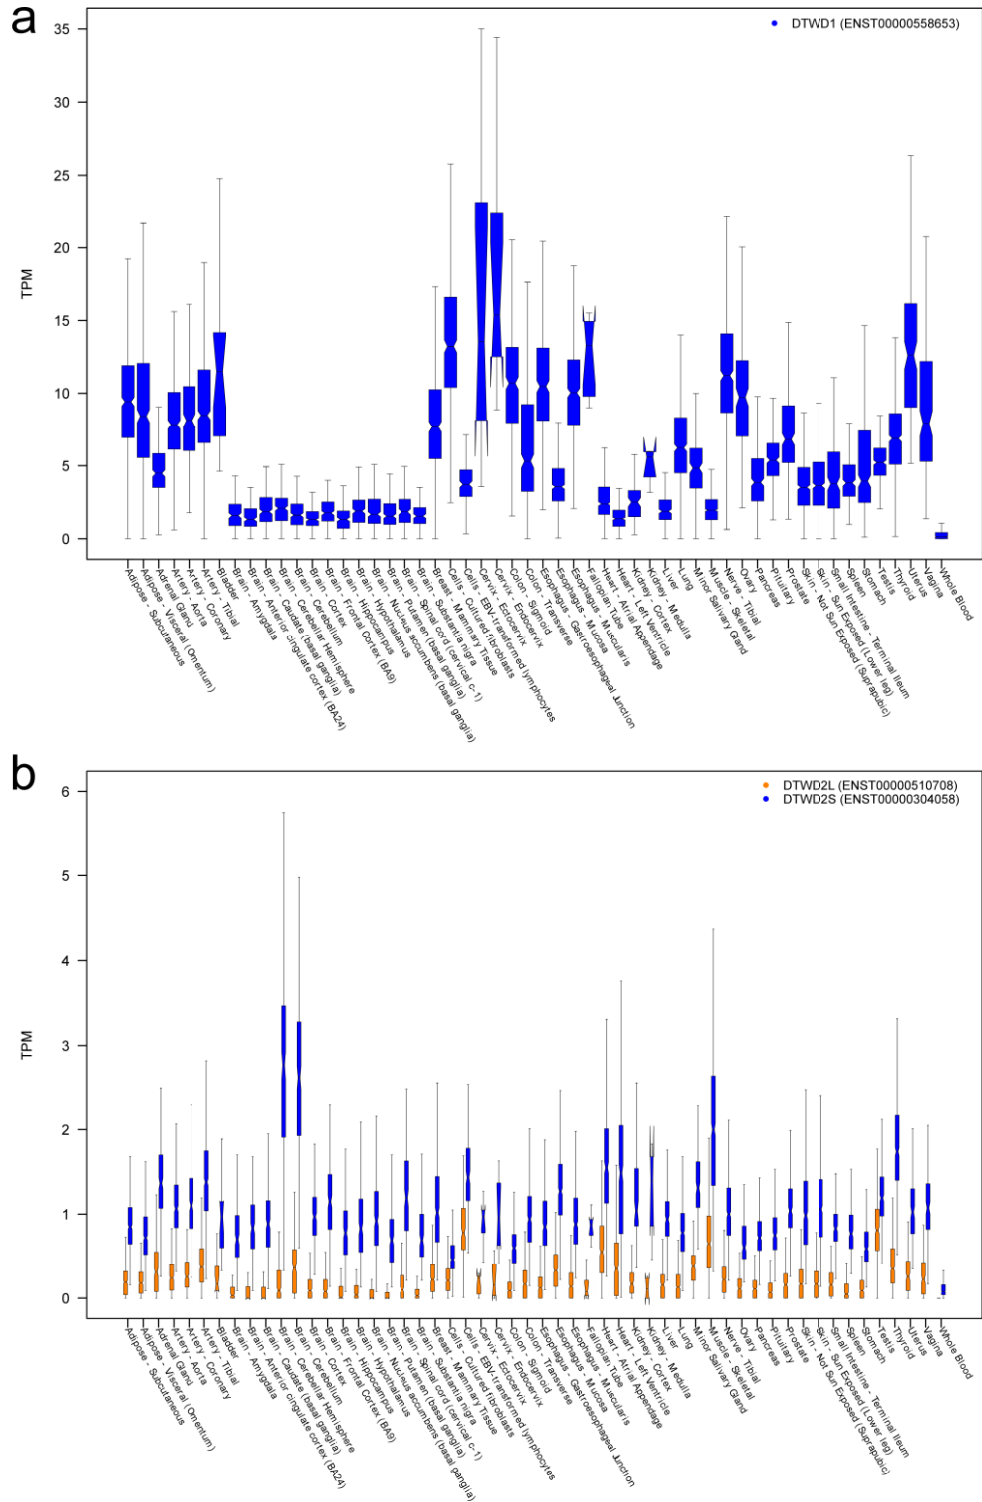

**Supplementary Figure 9. Expression profiles of *DTWD1*, *DTWD2L*, and *DTWD2S* in human tissues.**

Transcript per million (TPM) of *DTWD1* (a), *DTWD2L*, and *DTWD2S* (b) from various human tissues were obtained from GTEx Analysis V8<sup>4</sup> and plotted as notched boxplot.

## Supplementary References

- 1 Chen, F., Mackey, A. J., Stoeckert, C. J., Jr. & Roos, D. S. OrthoMCL-DB: querying a comprehensive multi-species collection of ortholog groups. *Nucleic Acids Res* 34, D363-368, doi:10.1093/nar/gkj123 (2006).
- 2 Letunic, I. & Bork, P. Interactive Tree Of Life (iTOL) v4: recent updates and new developments. *Nucleic Acids Res* 47, W256-W259, doi:10.1093/nar/gkz239 (2019).
- 3 Kumar, S., Stecher, G., Li, M., Knyaz, C. & Tamura, K. MEGA X: Molecular Evolutionary Genetics Analysis across Computing Platforms. *Molecular biology and evolution* 35, 1547-1549, doi:10.1093/molbev/msy096 (2018).
- 4 Carithers, L. J. *et al.* A Novel Approach to High-Quality Postmortem Tissue Procurement: The GTEx Project. *Biopreservation and biobanking* 13, 311-319, doi:10.1089/bio.2015.0032 (2015).

**Supplementary Table 1. List of primers and probes****Primers**

|                     |                                                               |
|---------------------|---------------------------------------------------------------|
| yfiPCDS_Fw          | GTGATCTGCATATGACCGAAAACGCTGTTCT                               |
| yfiPCDS_Rv          | GTGATCTGCTCGAGTTAAACGCTTTCTAACTGTTCTGC                        |
| Met_transcript_Fw   | GCTAATACGACTCACTATA GGCUACGUAGCUC                             |
| Met_transcript_Rv   | TGGTGGCTACGACGGGATTCTGAACCCG                                  |
| Met_transcript_body | GGCTACGTAGCTCAGTTGGTTAGAGCACATCACTCATAATGATGGGGTCACAGGTTCAATC |
| DTWD1CDS_Fw         | GTGATCTGGATATC ATGTCTCTCAATCCACCTATATTTC                      |
| DTWD1CDS_Rv         | GTGATCTGGCGGCCGC ATGTGTAAGTTTTCTGTTTCC                        |
| DTWD2Lnest_Fw       | TTCAATGCCACGGCCTGAC                                           |
| DTWD2Lnest_Rv       | CCTGCTTTTCAGTGAGCCAGTG                                        |
| DTWD2LCDS_Fw        | GTGATCTGGATATC ATGGAGTCGCAGAAAGAG                             |
| DTWD2LCDS_Rv        | GCGAGCTGGCGGCCGCAATTTTAACTATTTCATTAAC                         |
| DTWD2S_Fw           | CGGCCTCAGAAAGTGTGTTG                                          |
| DTWD2S_Rv           | GATATCTGCAGAATCCACCACAC                                       |
| sgRNA1_Fw           | CACCGCTTCGTTTGAGAAATATAGG                                     |
| sgRNA1_Rv           | AAACCCTATATTTCTCAAACGAAGC                                     |
| PCR1_Fw             | AGTGTGCCAATTTGGTGGTT                                          |
| PCR1_Rv             | TCCCACTTTGCTGAGCTTTT                                          |
| sgRNA2_Fw           | CACCGTGTATAGCAGTAGAACATTC                                     |
| sgRNA2_Rv           | AAACGAATGTTCTACTGCTATACAC                                     |
| PCR2_Fw             | CTCCATAGCTTCAGAAGATCCCC                                       |
| PCR2_Rv             | CAGAAGTAAATGTGCCCTGCTGAG                                      |
| sgRNA3_Fw           | CACCGATGCTGAATTATGTACAAG                                      |
| sgRNA3_Rv           | AAACCTTGTACATAATTCAGCATC                                      |
| PCR3_Fw             | CTTCGTGTTTCTCTTGTGGACTC                                       |
| PCR3_Rv             | CCTCTTTGTATAAATGCAGTGGGATTAAGGTC                              |
| sgRNA4_Fw           | CACCGGGAGGCATGCTGCTAGTAG                                      |
| sgRNA4_Rv           | AAACCTACTAGCAGCATGCCTCCC                                      |
| PCR4_Fw             | TGCCCTAACAGTTAATTTACCTTTCTTCACTGAAGC                          |
| PCR4_Rv             | CTGTGGTCTTTAGTAAAAGACTTGTGAAAGTTATGC                          |
| sgRNA5_Fw           | CACCGCCCCAGAAGGCCGCGCAAC                                      |
| sgRNA5_Rv           | AAACGTTGCGCGCCCTTCTGGGGC                                      |
| PCR5_Fw             | TGCACTCAGGCCTCCGCT                                            |
| PCR5_Rv             | TGCGGGCATTGCGCTACG                                            |

**Probes for RCC and Northern blotting**

|                 |                                           |
|-----------------|-------------------------------------------|
| E. coli Met     | TGGTGGCTACGACGGGATTCTGAACCTGTGA           |
| human Asn-GTT-2 | TGGCGTCCCTGGGTGGGCTCGAACCACCAACCTTTTCGGTT |
| human Cys-GCA-2 | TGGAGGGGGCACCCGGATTTGAACCGGGACCTCTTGATC   |
| human Ile-AAT-1 | TGGTGGCCCGTACGGGGATCGAACC CGGACCTTGGCGTT  |
| human Ile-TAT-2 | TGGTGTCCAGGTGAGGCTCGAACTCACAACCTCGGCATT   |
| human Tyr-GTA-2 | TGGTCTTCGAGCCGGAATCGAACCAGCGACCTAAGGATC   |
